# Supplementary material
Source: HighWire-hosted journal article supplement (https://www.cmaj.ca/highwire/filestream/58439/field_highwire_adjunct_files/2/guideline5french2001.pdf)
Supplement: guideline5french2001.pdf [file guideline5french2001.pdf]

# Guides de pratique clinique pour la prise en charge et le traitement du cancer du sein

## 5. Traitement d'un carcinome canalaire in situ (CCIS) (mise à jour de 2001)

Ivo A. Olivotto et Mark Levine, pour le Comité directeur des guides de pratique clinique pour la prise en charge et le traitement du cancer du sein\*

Le D<sup>r</sup> Olivotto est associé au BC Cancer Agency, Vancouver Island Cancer Centre, et à l'Université de la Colombie-Britannique, Victoria (C.-B.), et le D<sup>r</sup> Levine est associé au Centre régional de cancérologie de Hamilton, Action Cancer Ontario, et à l'Université McMaster, Hamilton (Ont.).

\*Le Comité directeur fait partie de l'Initiative canadienne sur le cancer du sein de Santé Canada.

---

### Résumé

**Objectif :** Aider les médecins et les patientes à choisir la démarche la plus efficace sur le plan clinique pour le traitement d'un carcinome canalaire in situ (CCIS).

**Options :** Mastectomie, chirurgie mammaire conservatrice (CMC) avec exérèse tumorale élargie associée à une radiothérapie, ou CMC simple.

**Résultats :** Survie, récurrence locale, résultat esthétique, complications associées au traitement.

**Preuves :** Recension systématique des documents en anglais publiés de 1976 à avril 2001 trouvés dans les bases de données MEDLINE et CANCERLIT. Recension non systématique jusqu'en juin 2001.

### Recommandations :

#### *Diagnostic et examen anatomopathologique*

- Après l'anamnèse et l'examen clinique, c'est l'examen mammographique complet qui constitue la première étape du diagnostic d'un CCIS.
- Si l'on soupçonne la présence d'un CCIS, il faut pratiquer une biopsie de la lésion; on peut avoir recours à la biopsie par forage guidée par des techniques d'imagerie ou à la biopsie chirurgicale.
- Lors de l'excision chirurgicale, il faut enlever la région suspecte en une seule pièce et radiographier la pièce opératoire.

- L'examen anatomopathologique devrait s'attacher aux paramètres qui orientent le traitement, y compris, au minimum, la taille, la morphologie et le grade de la lésion, la présence de nécrose, et la largeur des marges.
- En vue d'obtenir suffisamment de données anatomopathologiques pour planifier le traitement, il faudrait prêter attention à la préparation et à l'analyse des tissus.
- La pièce opératoire devrait, dans toute la mesure du possible, être examinée par un pathologiste expérimenté dans le domaine du cancer du sein.

### *Traitement*

- Les stratégies thérapeutiques possibles dans les cas de CCIS comprennent la mastectomie, la CMC associée à une radiothérapie et la CMC simple. Le traitement devrait viser à parvenir au maximum de contrôle local. Le traitement optimal pour une patiente devrait tenir compte de l'étendue et du type de la lésion, de la possibilité qu'une excision acceptable sur le plan esthétique laisse des marges indemnes, et de la préférence de la patiente, qu'elle décide de conserver le sein, ou d'éviter d'autre traitement ou un risque de récurrence du cancer du sein. Lorsqu'on parvient au contrôle local, le choix d'un traitement local n'influe pas pour la peine sur la survie.
- Comparativement à la CMC, la mastectomie est reliée à une morbidité chirurgicale plus grave, notamment de la douleur, un retard occasionnel de la cicatrisation et un lymphocèle. La perte d'un sein peut en outre avoir un retentissement psychosocial important et de longue durée.
- Chez les patientes atteintes d'un CCIS qui subissent une CMC, il faudrait pratiquer une excision élargie pour retirer l'ensemble du CCIS que révèlent les examens mammographiques et anatomopathologiques. L'intervention devrait être suivie d'une imagerie par mammographie du sein atteint si la radiographie de la pièce ne met pas nettement en évidence toutes les microcalcifications.
- Le risque de récurrence locale est plus élevé après une CMC qu'après une mastectomie. La sélection des patientes et la radiothérapie adjuvante permettent de réduire, mais non d'éliminer, cet écart.
- La CMC devrait normalement être suivie d'une radiothérapie. Il est difficile de reconnaître les patientes pour qui le risque de récurrence locale sera suffisamment faible après une CMC simple. Il est toutefois possible, après en avoir discuté attentivement avec la patiente, d'envisager la possibilité de pratiquer exclusivement une CMC si l'examen anatomopathologique détaillé confirme que la lésion est petite, qu'elle ne présente pas de noyau bien différencié ou de nécrose de type comédocarcinome, et que les marges sont indemnes. Dans l'affirmative, il faudra aussi vérifier que l'exérèse est susceptible de donner des résultats esthétiques satisfaisants.

- Avant de décider entre la CMC et la mastectomie, la patiente devrait avoir reçu des explications sur le rôle de la radiothérapie, ses effets secondaires et les modalités pratiques connexes.
- Toutes les patientes atteintes d'un CCIS peuvent choisir de subir une mastectomie. La mastectomie est indiquée lorsque les lésions sont à ce point importantes et diffuses que leur exérèse complète ne peut être obtenue sans préjudice esthétique inacceptable. Elle peut également être envisagée dans les cas d'envahissement persistant des marges, après au moins deux tentatives d'excision. Si une mastectomie est pratiquée, la reconstruction du sein est une possibilité.
- La mastectomie ne devrait pas être suivie d'une radiothérapie locale ou d'un traitement systémique adjuvants.
- La mastectomie bilatérale n'est généralement pas indiquée chez les patientes présentant un CCIS unilatéral.
- Chez les femmes atteintes d'un CCIS, l'évidement axillaire, qu'il soit complet ou limité, n'est pas indiqué.
- Le rôle que joue le tamoxifène dans le traitement des patientes atteintes d'un CCIS est en train de se dessiner. Il importe de discuter des avantages et des risques possibles du traitement au tamoxifène avec les patientes.
- Il importe d'offrir aux patientes de participer à des études cliniques, lorsque c'est possible.

**Validation :** La version originale a fait l'objet de révisions par un comité de rédaction, par des lecteurs principaux et secondaires, et par le Comité directeur des guides de pratique clinique pour la prise en charge et le traitement du cancer du sein. Le document final est le fruit d'un consensus parmi tous ces collaborateurs. La présente mise à jour n'a pas fait l'objet d'un examen externe. Un comité de rédaction a actualisé la première version qu'il a soumis à l'examen, la révision et l'approbation du Comité directeur.

**Commanditaire :** Le Comité directeur des guides de pratique clinique pour la prise en charge et le traitement du cancer du sein a été constitué par Santé Canada.

**Complété :** Juillet 2001

---

Le présent guide traite de la classification et de la prise en charge du carcinome canalaire in situ (CCIS ou carcinome intracanaulaire) du sein<sup><1,2></sup>. Le CCIS est une prolifération de cellules malignes qui apparaissent dans les canaux galactophores et les lobules glandulaires terminaux du sein sans traverser les membranes basales entourant les galactophores. Sur le plan anatomopathologique, il importe de distinguer le CCIS (stade T<sub>is</sub> du système TNM)<sup><3></sup> de l'hyperplasie canalaire

atypique<1,4> et du cancer du sein avec envahissement microscopique (stade T1<sub>mic</sub> du TNM)<1–3,5>. Depuis le milieu des années 80, la fréquence du CCIS a quintuplé, augmentation reliée à l'utilisation de plus en plus courante du dépistage mammographique<6,7>.

## **Méthodes**

Le présent guide repose sur la recension systématique de documents en anglais publiés de 1976 à avril 2001 trouvés principalement dans les bases de données MEDLINE et CANCERLIT en utilisant les mots-clés que voici : « breast neoplasms », « carcinoma in situ », « carcinoma, intraductal, non-infiltrating » comme vedettes-matières, et « duct », « dcis », et « ductal carcinoma » comme mots de texte. La recherche se limitait aux études cliniques contrôlées, aux méta-analyses, aux guides de pratique et aux recensions d'écrits sur le sujet. Les références citées dans les articles de synthèse et les manuels ont également été utilisées. Une recension non systématique des écrits s'est poursuivie jusqu'en juin 2001. Les preuves sur lesquelles s'appuient les conclusions ont été classées en cinq niveaux (voir les niveaux de preuves)<8>. Le processus itératif adopté pour élaborer ce guide a été décrit précédemment<9>. Un comité de rédaction a actualisé la première version du guide puis l'a soumis à l'examen, à la révision et à l'approbation du comité directeur.

## **Diagnostic et examen anatomopathologique**

### ***Diagnostic d'un CCIS***

- **Après l'anamnèse et l'examen clinique, c'est l'examen mammographique complet qui constitue la première étape du diagnostic d'un CCIS.**

Le CCIS se manifeste le plus souvent sous forme de calcifications irrégulières ou en grappes sur le cliché mammaire de dépistage d'une femme qui ne présente autrement aucun symptôme. Les patientes atteintes d'un CCIS peuvent présenter un écoulement mamelonnaire ou une masse palpable qui s'accompagnent habituellement de calcifications révélées à l'examen mammographique. Le CCIS peut aussi être constaté par accident lors de la biopsie d'une lésion bénigne.

Lorsqu'on soupçonne un CCIS, il faut procéder à une imagerie détaillée du sein avant de pratiquer une biopsie parce que le CCIS pourrait être très important et pourrait progresser sous forme de réseaux discontinus de calcifications<10>. Il faudrait au moins réaliser pour chaque patiente des clichés mammographiques bilatéraux à deux vues de grande qualité, avec agrandissement radiologique ou d'autres vues spéciales de toutes les régions où se trouvent des calcifications, des masses ou des ruptures d'architecture. L'évaluation mammographique préalable à la biopsie vise à dresser un plan précis des régions qui pourraient être atteintes par le CCIS et à déterminer où on pratiquera la biopsie.

- **Si l'on soupçonne la présence d'un CCIS, il faut pratiquer une biopsie de la lésion; on peut avoir recours à la biopsie par forage guidée par des techniques d'imagerie ou à la biopsie chirurgicale.**
- **Lors de l'excision chirurgicale, il faut enlever la région suspecte en une seule pièce et radiographier la pièce opératoire.**

Dans les centres qui disposent de l'équipement requis, il est recommandé de pratiquer une biopsie par forage guidée par des techniques d'imagerie pour établir le diagnostic et déterminer le volume d'excision approprié<11–16>.

Bien que la biopsie par forage faisant appel à la stéréotaxie permette d'affirmer la présence ou l'absence d'un CCIS, il faut un examen anatomopathologique de la totalité de la lésion excisée pour exclure le diagnostic de cancer invasif et pour déterminer la taille de la lésion et l'état des marges. Lorsque ce sera possible, il faudrait enlever en une seule pièce toute la région considérée comme suspecte sur le cliché mammaire. La pièce opératoire devrait être orientée par le chirurgien, et il faudrait la radiographier pour relever les régions suspectes et confirmer que la lésion a bien été excisée dans sa totalité<11–17,18>. En temps normal, on ne doit pas demander de coupes congelées ni un dosage des récepteurs hormonaux.

#### ***Facteurs anatomopathologiques de pronostic***

- **L'examen anatomopathologique devrait s'attacher aux paramètres qui orientent le traitement, y compris, au minimum, la taille, la morphologie et le grade de la lésion, la présence de nécrose, et la largeur des marges.**

Un examen anatomopathologique approfondi est essentiel au traitement approprié d'un CCIS. Il faut chercher à relever la présence d'un envahissement visible ou microscopique. Dans l'affirmative, le stade de la patiente devrait être établi à T1<sub>mic</sub> ou à T1<sub>a/b/c</sub>, suivant le volume maximal de l'atteinte invasive, et le cas ne devrait pas être reconnu ou pris en charge comme un CCIS. Il a été indiqué dans une série, qui comprenait un court suivi, que les issues des CCIS étaient équivalentes qu'il y ait envahissement microscopique ou non (preuves de niveau V)<19>.

De multiples facteurs anatomopathologiques ont été examinés dans le dessein d'établir des prédicteurs possibles de la récurrence locale chez les patientes dont le CCIS a été excisé<2,20–41>. Autour de 50 % des récurrences locales s'accompagnent d'un envahissement. Les chercheurs ont tenté de cerner un sous-groupe de femmes dont le risque de récurrence de cancer du sein serait suffisamment faible pour qu'on ne pratique qu'une chirurgie mammaire conservatrice (CMC).

Une conférence internationale de concertation a formulé des recommandations au sujet de la classification et de l'analyse anatomopathologique du CCIS<17>. Les facteurs les plus utiles sur le plan clinique sont les suivants : grade nucléaire, nécrose, largeur des marges et volume de la lésion<17,28,42–47>. Le grade nucléaire, la présence de nécrose et la largeur des marges ont été combinés dans divers indices de pronostic<28,42–47>.

*Morphologie de la tumeur* : Le type architectural du CCIS (tumeur solide, type cribriforme, comédocarcinome, papillaire, micropapillaire) a souvent servi à la classification. S'il convient de noter ces observations, elles n'ont pas été reliées au risque de récurrence locale avec autant de constance que la présence de nécrose, le grade nucléaire et la largeur des marges<46,48>.

L'aspect architectural de type comédocarcinome est caractérisé par une nécrose extensive et par la présence de cellules volumineuses et polymorphes ayant un noyau anormal à mitoses fréquentes. Il est plus probable que ces tumeurs soient associées à un envahissement microscopique et qu'elles réapparaissent après une CMC pratiquée sans autre traitement<22,29–32>.

*Grade nucléaire et nécrose* : Le grade nucléaire (faible, intermédiaire, élevé) et la nécrose (présence ou absence, nécrose ponctuelle ou de type comédocarcinome) ont été étudiés seuls ou de concert. Un lien a été établi entre un grade nucléaire élevé et une nécrose de type comédocarcinome. Il est possible, quoique moins fréquent, que ce type de nécrose soit relié à un grade nucléaire intermédiaire, et, à l'occasion, à un faible grade nucléaire. Les modèles de pronostic qui tiennent compte de la nécrose et du grade ont présenté une valeur prédictive pour la récurrence locale qui était supérieure à celle du grade ou de la nécrose utilisés seuls<28,29,36,44,47>. Auprès d'une série de patientes qui ont subi une CMC conjuguée à une radiothérapie, un grade nucléaire élevé a été relié avec des taux de récurrence à cinq et à dix ans supérieurs à ceux des patientes présentant un faible grade nucléaire. Il n'y avait toutefois pas de différence entre les patientes présentant des lésions de faible grade nucléaire et de grade nucléaire élevé au chapitre des taux de récurrence à 15 ans<33>.

*Largeur des marges* : Des études cliniques ont fait ressortir un lien entre des marges considérées comme positives ou intermédiaires et un risque accru de récurrence locale (preuves de niveau I)<36,45,49>. Des preuves de niveaux IV et V indiquent qu'une réduction du risque de récurrence est attribuable à l'augmentation du volume de tissu enlevé au cours d'une réexcision<2,21,45,50–52>. Tous les auteurs des écrits recensés considéreraient une marge d'au moins 1 cm de tissu mammaire indemne comme large. On ne connaît pas exactement la largeur *minimale* de la marge saine pour les patientes traitées par CMC seulement. Un CCIS de type exclusivement micropapillaire peut gagner beaucoup du tissu mammaire, et il pourrait être ardu de parvenir sans mastectomie à des marges saines<53>. Un examen anatomopathologique détaillé reposant sur un vaste échantillon de marges a démontré un lien entre une marge d'au moins 10 mm et un taux de récurrence homolatérale de cancer du sein à 8 ans de 3 à 4 % après une CMC associée ou non à une radiothérapie (preuves de niveau IV)<45>.

*Volume de la lésion* : Il arrive souvent que l'importance du CCIS soit sous-estimée en fonction de son aspect sur le cliché mammaire<10>. Des lésions de moins de 2,5 cm<5,31>, ou dans certaines études, de 1,5 cm<28,47>, ont été reliées à des taux de récurrence du cancer du sein inférieurs à ceux des lésions plus volumineuses. En outre, un lien a été établi entre une prolifération diffuse et une plus faible probabilité de parvenir à de larges marges de tissu sain. Dans une série, où il est arrivé souvent que les patientes ont dû se soumettre à des réexcisions, on a procédé à un examen des marges reposant sur un échantillon détaillé pour confirmer la présence de marges indemnes d'au moins

10 mm, et le volume de la lésion ne permettait pas de prévoir le risque de récurrence (preuves de niveau IV)<45>. L'éventualité d'un résultat esthétique médiocre compromet souvent la réalisation de marges très larges autour d'un CCIS volumineux.

*Autres facteurs* : Des marqueurs biologiques et des facteurs de croissance comme les récepteurs d'œstrogène, HER2, p53, la ploïdie et la fraction de phase S ont été étudiés et intégrés à des indices de pronostic (preuves de niveau V)<27>. Ces facteurs n'ont pas été reliés de façon constante aux risques de récurrence du cancer du sein et à l'heure actuelle, ils ne permettent pas de choisir le traitement. Ils pourraient s'avérer utiles dans un contexte de recherche.

*CCIS multifocale et multicentrique* : Des descriptions antérieures de la multifocalité et de la multicentricité du CCIS ont prêté à confusion. Les tumeurs multifocales apparaissent sous forme de foyers distincts dans un même quadrant, à divers endroits le long d'un seul système galactophore, et s'accompagnent souvent de réseaux discontinus de calcifications constatés sur le cliché mammaire. Les tumeurs multicentriques apparaissent dans divers systèmes galactophores de plusieurs segments du sein et se présentent comme des foyers satellites du premier foyer tumoral qui sont séparés par au moins 5 cm de tissu mammaire normal. La multifocalité est courante. La multicentricité véritable est rare<10>. En se fondant sur une étude attentive d'une série de coupes et sur la corrélation radiologique-anatomopathologique des constatations sur les pièces opératoires consécutives aux mastectomies, Holland et ses collaborateurs ont mis en évidence une multifocalité chez 23 % des patientes et une multicentricité dans 1,5 % des cas<10>. Des études antérieures avaient signalé des taux de multicentricité oscillant entre 15 % et 78 % des cas, une variation considérable qui est attribuable au fait qu'on a utilisé des définitions du terme « multicentricité » et des techniques de prélèvement variables et que le volume de tissu excisé n'était pas toujours le même<32, 34, 35, 54–56>. La CMC ne permet pas d'exciser complètement les tumeurs vraiment multicentriques. La multifocalité, si elle est diffuse, nécessitera une excision très large qui pourrait avoir des effets indésirables sur les résultats esthétiques, et il est fort probable que ces lésions soient reliées à un risque accru de foyers résiduels après la CMC.

### ***Préparation des tissus***

- ***En vue d'obtenir suffisamment de données anatomopathologiques pour planifier le traitement, il faudrait prêter attention à la préparation et à l'analyse des tissus.***

Si l'on envisage de pratiquer une CMC, il faudrait se pencher attentivement sur la préparation et l'analyse des tissus en vue d'obtenir suffisamment de données anatomopathologiques pour planifier le traitement<17>. Il faudrait marquer les marges de la pièce opératoire avant la coupe. La pièce devrait être entièrement découpée en tranches de 3 à 5 mm, qui seront étiquetées de façon séquentielle (du plan médial au plan latéral). Il faudrait appliquer le même processus aux pièces consécutives aux réexcisions. Une préparation méthodique de la pièce permet une meilleure caractérisation et un meilleur examen de la largeur des marges et du volume de la lésion que les coupes aléatoires ou une préparation partielle des tissus. Le volume de la lésion est établi en multipliant le nombre de sections séquentielles qui contiennent des cellules de CCIS par la largeur

moyenne des tranches. Par exemple, une pièce de biopsie de 2,5 cm, sectionnée à 3 mm d'intervalle, comporterait huit sections de A à H. Si la présence d'un CCIS était constatée dans les sections C à G, la taille estimative de la lésion s'établirait à 15 mm (3 mm x 5 coupes). Il n'est pas recommandé de pratiquer des coupes aléatoires sur la pièce opératoire ou d'examiner seulement les régions qui présentent des calcifications.

Le compte rendu anatomopathologique devrait porter un commentaire traitant précisément de la présence de calcifications et de leur lien avec un CCIS, une affection bénigne, ou les deux, de même que de la présence et du type de nécrose, du grade nucléaire et de la mesure dans laquelle les constatations anatomopathologiques correspondent à l'aspect radiologique<17>.

L'évaluation des marges exige la quantification de la distance entre les canaux galactophores cancéreux et de la surface encrée de la pièce opératoire soumise à l'examen au microscope. La largeur des marges doit être mesurée au point le plus rapproché et exprimée en millimètres, et en cas d'envahissement des marges, il faudrait préciser s'il est diffus ou en foyers.

- **La pièce opératoire devrait, dans toute la mesure du possible, être examinée par un pathologiste expérimenté dans le domaine du cancer du sein.**

Le diagnostic histopathologique de CCIS est souvent difficile. Dans un essai clinique multicentrique, 9 % des lésions initialement diagnostiquées comme des CCIS ont été reclassifiées à la suite d'un nouvel examen anatomopathologique des pièces. Dans 7 % des cas, on a posé le nouveau diagnostic d'hyperplasie canalaire atypique, et dans 2 % des cas, celui de cancer du sein invasif (preuves de niveau III)<36>. En outre, dans 21 % des cas, il a été impossible de rechercher tous les aspects caractéristiques des CCIS en raison de l'insuffisance des prélèvements. Étant donné qu'un examen anatomopathologique détaillé est essentiel pour une classification exacte du CCIS, en vue de déterminer le pronostic et les choix de traitement, il est plus prudent de faire étudier la pièce de biopsie par un service de pathologie spécialisé en la matière lorsque le pathologiste a peu d'expérience dans le domaine de l'anatomopathologie du cancer du sein.

## **Traitement**

- **Les stratégies thérapeutiques possibles dans les cas de CCIS comprennent la mastectomie, la CMC associée à une radiothérapie et la CMC simple. Le traitement devrait viser à parvenir au maximum de contrôle local. Le traitement optimal pour une patiente devrait tenir compte de l'étendue et du type de la lésion, de la possibilité qu'une excision acceptable sur le plan esthétique laisse des marges indemnes, et de la préférence de la patiente, qu'elle décide de conserver le sein, ou d'éviter d'autre traitement ou un risque de récurrence du cancer du sein. Lorsqu'on parvient au contrôle local, le choix d'un traitement local n'influe pas pour la peine sur la survie.**

Les CCIS doivent être traités car, en l'absence de traitement, un cancer invasif apparaîtra chez un certain nombre de patientes. On ne dispose que de données restreintes

sur le taux d'apparition de cancers invasifs car, dans le passé, la majorité des cas étaient traités par mastectomie. Selon les estimations présentées dans un compte rendu de sept séries de cas d'envergure restreinte regroupant au total 107 patientes traitées par biopsie simple, le risque de cancer invasif s'établit à 35 % dans les 10 ans (preuves de niveau V)<20>. Les patientes qui ont pris part aux séries présentaient un CCIS mal différencié, d'abord considéré comme bénin. Le risque de récurrence en présence d'un CCIS bien différencié serait plus élevé. On a indiqué que la fréquence de découverte des CCIS sur pièce d'autopsie chez des femmes complètement asymptomatiques pouvait atteindre 16 %<37>. Des études randomisées et contrôlées et des séries de cas multiples qui portaient sur des patientes atteintes d'un CCIS qui ont subi une CMC ont indiqué qu'approximativement 50 % des carcinomes qui réapparaissent seront invasifs (preuves de niveaux I, IV et V)<21,30,37-41,43,45,51,58-63>. Par conséquent, bien qu'il soit possible qu'un certain nombre des lésions primaires décelées par mammographie de dépistage ne deviennent pas un cancer invasif en l'absence de traitement, la démarche thérapeutique devrait viser à parvenir au maximum de contrôle local.

Aucune étude clinique randomisée n'a comparé l'efficacité de la mastectomie et de la CMC dans le traitement du CCIS. Plusieurs séries de cas ont toutefois fait état de taux de survie semblables après l'une ou l'autre de ces interventions (preuves de niveau V)<21,59,62,64,65>. Chez les patientes traitées par mastectomie, le taux de survie à dix ans variait de 98 à 100 %, et chez les patientes traitées par CMC associée à une radiothérapie, le taux variait de 95 % à 100 % (preuves de niveau V)<30,59,60,64>. Des taux de survie globales analogues ont été constatés chez certaines patientes dont les marges étaient indemnes après une CMC simple (preuves de niveaux I et IV)<37,45,63>.

- **Comparativement à la CMC, la mastectomie est reliée à une morbidité chirurgicale plus grave, notamment de la douleur, un retard occasionnel de la cicatrisation et un lymphocèle. La perte d'un sein peut en outre avoir un retentissement psychosocial important et de longue durée.**

Les patientes atteintes d'un cancer du sein avec envahissement signalent souffrir d'une détresse psychologique d'ampleur équivalente, qu'elles aient été traitées par mastectomie ou par CMC. En revanche, les patientes ayant subi une mastectomie vivent de plus grands bouleversements aux chapitres de la satisfaction, de la détresse psychologique (anxiété, dépression), de l'image corporelle et du sentiment de féminité (preuves de niveau V)<66-70>. Dans une enquête rétrospective à laquelle se sont prêtées des patientes ayant participé à une étude randomisée qui comparait la mastectomie et la CMC, les proportions d'entre elles ayant signalé une anxiété ou une dépression importantes étaient semblables dans les deux groupes : 33 % des femmes traitées par mastectomie et 18 % des femmes traitées par CMC<67>. Dans une autre étude, il a été démontré que la détresse psychologique à long terme était de plus forte intensité après une mastectomie, moyenne après une mastectomie suivie d'une reconstruction, et à son plus faible après une CMC<70>. Certaines patientes auront une préférence marquée pour la CMC. D'autres opteront pour une mastectomie, voire une mastectomie bilatérale, craignant les risques associés à la conservation du sein « malade » (preuves de niveau V)<71>. Ces questions sont examinées plus en profondeur dans [le guide n° 3](#).

- **Chez les patientes atteintes d'un CCIS qui subissent une CMC, il faudrait pratiquer une excision élargie pour retirer l'ensemble du CCIS que révèlent les examens mammographiques et anatomopathologiques. L'intervention devrait être suivie d'une imagerie par mammographie du sein atteint si la radiographie de la pièce ne met pas nettement en évidence toutes les microcalcifications.**

Vu qu'il est établi que des foyers résiduels de CCIS sont présents chez près de 45 % des patientes traitées par CMC, cette technique chirurgicale commande une excision élargie pour faire en sorte que toutes les régions atteintes que révèlent les examens mammographiques et anatomopathologiques soient enlevées (preuves de niveau V)<51,72,73>. Holland et ses collaborateurs (preuves de niveau V)<10> ont montré que les lésions pouvaient progresser de plus de 2 cm au-delà de la zone connue de microcalcifications dans 16 % des cas de CCIS bien différencié de type comédocarcinome et dans 40 % à 50 % des cas de CCIS mal différencié de type cribriforme ou micropapillaire. Les résultats esthétiques d'une CMC est fonction de la compétence du chirurgien ainsi que de la taille de la lésion et du volume du sein. Dans des cas où le CCIS est diffus, il pourrait être difficile de parvenir à des résultats esthétiques satisfaisants, et une mastectomie pourrait être préférable.

Lorsqu'un CCIS est relié à des microcalcifications et que la radiographie de la pièce opératoire ne démontre pas clairement que toutes les calcifications ont été enlevées, il faudrait effectuer une mammographie postopératoire du sein homolatéral. Toutefois, il ne faudrait pas pratiquer cet examen moins de quatre à six semaines après la chirurgie, et même après ce délai, la qualité du cliché mammaire pourrait être compromise par la sensibilité du sein qui restreint la tolérance de la patiente à la compression. La découverte de microcalcifications résiduelles pourrait indiquer la présence de foyers résiduels de CCIS et le besoin d'autre chirurgie (preuves de niveau V)<59,73>.

- **Le risque de récurrence locale est plus élevé après une CMC qu'après une mastectomie. La sélection des patientes et la radiothérapie adjuvante permettent de réduire, mais non d'éliminer, cet écart.**

Après une mastectomie, une récurrence au niveau de la paroi thoracique survient dans moins de 1 % des cas<74–76>. Chez les patientes qui ont subi une CMC seulement, le risque de récurrence locale oscille entre 4 et 60 % après dix ans, suivant la sélection des patientes, les caractéristiques pathologiques et l'ampleur du geste opératoire<19,28,30,32,38,45,50>. Des études randomisées et des séries de cas ont démontré que les taux de récurrence sont réduits à peu près de moitié lorsqu'on administre une radiothérapie adjuvante du sein après la CMC (preuves de niveau I)<28,30,37–39,58,59,60,63,77>. Deux études cliniques multicentriques et randomisées ont analysé directement l'influence de la radiothérapie sur les récurrences après une CMC chez les patientes atteintes d'un CCIS<37,40,63>.

Dans l'étude B-17 du National Surgical Adjuvant Breast and Bowel Project (NSABP), 818 femmes du Canada et des États-Unis atteintes d'un CCIS ont été réparties au hasard en deux groupes pour recevoir soit une CMC simple, soit une CMC associée à une radiothérapie entre 1985 et 1990<37>. La majorité des lésions avaient été décelées à la mammographie et avaient un diamètre inférieur à 2 cm. Toutes les patientes devaient

avoir des marges saines à l'examen anatomopathologique, c.-à-d. des marges exemptes de tout CCIS selon l'examen du pathologiste local. Après un recul moyen de 90 mois, on a constaté que la radiothérapie permettait de réduire le risque de cancer secondaire dans le sein homolatéral : le risque de cancer in situ chutait de 13,4 % à 8,2 % ( $p = 0,007$ ) et le risque de cancer invasif chutait de 13,4 % à 3,9 % ( $p < 0,0001$ ) (preuves de niveau I)<sup><37></sup>. La radiothérapie semblait plus efficace pour prévenir la réapparition des cancers avec envahissement que des cancers non invasifs.

Dans le cadre de l'essai 10853, l'Organisation européenne de recherche sur le traitement du cancer (OERTC) a réparti au hasard, de 1986 à 1996, 1 010 patientes atteintes d'un CCIS provenant de 46 établissements de 13 pays d'Europe et d'Afrique du Sud en deux groupes, le premier subissant seulement une CMC et le deuxième subissant une CMC suivie d'une radiothérapie<sup><63></sup>. Soixante-et-onze pour cent des cas avaient été diagnostiqués par mammographie. Le diamètre moyen du CCIS s'établissait à 2 cm. Tous les cas devaient présenter des marges indemnes à l'examen anatomopathologique. La largeur des marges n'était pas mesurée, mais 34 % des patientes ont subi une réexcision. Après un suivi médian de 4,25 ans, la radiothérapie avait permis de réduire la récurrence locale, qui avait passé de 16 % à 9 % ( $p = 0,005$ ) (preuves de niveau I). La survie globale à quatre ans s'établissait à 99 % auprès des deux groupes. Après quatre ans, le taux de survie sans récurrence s'établissait à 98 % auprès des patientes qui avaient subi seulement une CMC, et à 99 % auprès des patientes qui avaient subi une CMC et une radiothérapie (différence non significative). La radiothérapie avait un effet préventif analogue pour les cancers invasifs et non invasifs.

- **La CMC devrait normalement être suivie d'une radiothérapie. Il est difficile de reconnaître les patientes pour qui le risque de récurrence locale sera suffisamment faible après une CMC simple. Il est toutefois possible, après en avoir discuté attentivement avec la patiente, d'envisager la possibilité de pratiquer exclusivement une CMC si l'examen anatomopathologique détaillé confirme que la lésion est petite, qu'elle ne présente pas de noyau bien différencié ou de nécrose de type comédocarcinome, et que les marges sont indemnes. Dans l'affirmative, il faudra aussi vérifier que l'exérèse est susceptible de donner des résultats esthétiques satisfaisants.**

Des études cliniques randomisées ont démontré que la radiothérapie permet de réduire le risque de récurrence invasive et non invasive du cancer dans le sein homolatéral même auprès des patientes dont les marges de la pièce opératoire sont indemnes<sup><37,63></sup>. Toutefois, comme nous l'avons indiqué précédemment, certaines caractéristiques anatomopathologiques comme la petite taille des lésions ( $< 2$  cm), de larges marges saines ( $\geq 1$  cm), un faible grade nucléaire et l'absence de nécrose permettent généralement de reconnaître les patientes dont le risque de récurrence est faible même si elles sont traitées par CMC sans radiothérapie<sup><33,45,52,78></sup>. Une patiente qui présente tous ces facteurs de risque favorables pourrait présenter un risque de récurrence du cancer du sein s'établissant entre 4 et 10 % dix ans après une CMC simple. Chez ces femmes, la radiothérapie réduira encore plus le risque de récurrence du cancer du sein, mais le gain absolu qu'elle représentera pour la patiente sera très modeste. L'omission de la radiothérapie pour certains cas particuliers en dehors du contexte de la recherche clinique

prête toujours à controverse. Si la radiothérapie est omise, la patiente devrait être informée de l'existence de cette modalité thérapeutique.

- **Avant de décider entre la CMC et la mastectomie, la patiente devrait avoir reçu des explications sur le rôle de la radiothérapie, ses effets secondaires et les modalités pratiques connexes.**

L'administration d'une radiothérapie après une CMC suppose des visites quotidiennes au centre de radiothérapie pendant 3 à 6 semaines. La radiothérapie pourrait également entraîner des dérangements et des coûts importants, surtout pour les patientes qui vivent à l'extérieur des grands centres. La plupart des patientes qui subissent une irradiation mammaire seront aux prises avec des effets secondaires de courte durée comme la fatigue, de la sensibilité au toucher, des rougeurs et du prurit, qui se résorbent pour la plupart dans les mois qui suivent la fin du traitement. Une sensibilité mammaire peut toutefois persister chez 5 à 10 % des patientes pendant une période de douze mois ou plus après le traitement. La radiothérapie peut également entraîner d'autres effets durables peu fréquents, notamment un résultat esthétique moins satisfaisant (voir [guide 6](#)).

Ces difficultés peuvent inciter certaines femmes à refuser la radiothérapie et à accepter le risque accru de récurrence locale et la possibilité d'une nouvelle intervention chirurgicale par CMC, ou même à choisir de subir une mastectomie. Il faut analyser à fond tous ces aspects lorsqu'on explique à la patiente les différentes modalités de traitement d'un CCIS.

- **Toutes les patientes atteintes d'un CCIS peuvent choisir de subir une mastectomie. La mastectomie est indiquée lorsque les lésions sont à ce point importantes et diffuses que leur exérèse complète ne peut être obtenue sans préjudice esthétique inacceptable. Elle peut également être envisagée dans les cas d'envahissement persistant des marges, après au moins deux tentatives d'excision. Si une mastectomie est pratiquée, la reconstruction du sein est une possibilité.**

Le risque de récurrence après une CMC est accru lorsque les marges de la pièce opératoire sont atteintes ou lorsque les lésions sont diffuses ou volumineuses (preuves de niveau V) <2,5,19,21,45,50,51,79>. Lorsqu'une lésion est volumineuse et qu'il est impossible de parvenir à des marges indemnes, le risque de récurrence de cancer du sein à 10 ans dépasse 30 %, même si l'on associe une radiothérapie à la CMC. La mastectomie est alors la modalité thérapeutique à privilégier <45,62>.

La mastectomie, si on y recourt, doit être une intervention complète. La reconstruction immédiate est une possibilité à envisager <70>.

La mastectomie sous-cutanée est une intervention à laquelle on a eu recours dans le passé dans les cas de CCIS, parce qu'elle permet une reconstruction acceptable sur le plan esthétique <80>. Selon Silverstein et ses collaborateurs <51>, cette intervention est sûre si elle est effectuée correctement. Néanmoins, un CCIS peut apparaître dans les sinus galactophores, et bien que la mastectomie sous-cutanée ait pour objectif d'exciser le

sein entier, elle laisse en place la plaque aréolo-mamelonnaire et environ 10 à 15 % du tissu mammaire. Par conséquent, la mastectomie sous-cutanée n'exclut pas complètement le risque de récurrence locale (preuves de niveau V)<64,81>.

- **La mastectomie ne devrait pas être suivie d'une radiothérapie locale ou d'un traitement systémique adjuvants.**

Vu que le risque de récurrence locale au niveau de la paroi thoracique s'établit au plus à 1 % après la mastectomie, il n'est guère utile de lui associer une autre thérapie locale (preuves de niveau V)<74,75>. Il n'existe pas de données fiables pour orienter la prise de décisions lorsqu'on observe la présence de résidus tumoraux dans les larges marges de la pièce de mastectomie ou à proximité. On ne dispose pas de données précises sur le recours au tamoxifène chez les patientes atteintes d'un CCIS qui ont subi une mastectomie. L'utilisation du tamoxifène réduira vraisemblablement le risque de CCIS et de cancer invasif dans le sein contralatéral (preuves de niveau I)<77,82,83>, mais ce traitement devrait être envisagé seulement dans le contexte de la prévention du cancer du sein. Le rôle du tamoxifène et d'autres agents de chimioprévention du cancer du sein, pour ce qui est notamment de la réduction du risque de cancer contralatéral, fait l'objet d'un guide distinct (voir guide 12).

- **La mastectomie bilatérale n'est généralement pas indiquée chez les patientes présentant un CCIS unilatéral.**

La mastectomie prophylactique du sein contralatéral a été envisagée pour les patientes présentant un CCIS unilatéral, en raison du risque de cancer bilatéral. Le taux d'apparition du cancer du sein contralatéral est comparable au risque approximatif annuel des femmes atteintes d'un cancer du sein invasif et unilatéral, qui s'établit à 0,5 % (preuves de niveau I)<37,63,83>. L'administration de tamoxifène réduit le taux de cancer contralatéral (preuves de niveau I)<77,82,83>.

Les mastectomies bilatérales pourraient convenir aux patientes atteintes de CCIS bilatéraux simultanés. Les risques de récurrence et les choix de thérapie locale, y compris la mastectomie, devraient être examinés de façon particulière pour chacun des seins et reposer sur les mêmes fondements que le choix d'un traitement local pour un CCIS unilatéral. On peut envisager une CMC bilatérale pratiquée avec ou sans radiothérapie, ou encore une mastectomie, si les caractéristiques particulières des tumeurs le permettent.

- **Chez les femmes atteintes d'un CCIS, l'évidement axillaire, qu'il soit complet ou limité, n'est pas indiqué.**

L'atteinte des ganglions axillaires est très rare dans les CCIS. La fréquence des métastases ganglionnaires peut atteindre de 3 à 5 % chez les femmes qui présentent un cancer du sein avec envahissement microscopique, mais un carcinome canalaire avec envahissement n'est pas tenu pour un CCIS (preuves de niveaux IV et V)<19,22,34,59,84,85>. La faible probabilité d'une atteinte des ganglions lymphatiques en l'absence d'envahissement indique qu'il n'y a pas lieu de pratiquer un évidement axillaire, même chez les patientes atteintes de lésions volumineuses bien différenciées et

de type comédocarcinome. La cartographie du système lymphatique et la biopsie du ganglion lymphatique sentinelle sont considérées comme expérimentales (voir [guide 13](#)).

- **Le rôle que joue le tamoxifène dans le traitement des patientes atteintes d'un CCIS est en train de se dessiner. Il importe de discuter des avantages et des risques possibles du traitement au tamoxifène avec les patientes.**

Dans l'étude B-24 du NSABP, 1 804 patientes du Canada et des États-Unis présentant un CCIS, qui avaient reçu entre 1991 et 1994 une CMC associée à une radiothérapie, ont été réparties au hasard pour recevoir pendant cinq ans soit du tamoxifène, à raison de 20 mg par jour, soit un placebo. L'administration du traitement au tamoxifène a permis de réduire le risque de cancer dans le sein homolatéral et dans le sein contralatéral. Avec un recul de 5 ans, le risque cumulatif d'apparition d'un cancer du sein s'établissait respectivement à 13,4 % et à 8,2 % ( $p = 0,0009$ ) auprès des patientes ayant reçu un placebo et de celles ayant reçu du tamoxifène. Le risque de cancer invasif a passé de 7,2 % à 4,1 % ( $p = 0,004$ ), et le risque de cancer in situ a passé de 6,2 % à 4,2 % ( $p = 0,08$ ) (preuves de niveau I)<77>. Le taux de réduction proportionnelle du risque de cancer du sein était de 38 %, un résultat analogue aux taux observés dans l'essai de prévention du cancer du sein du NSABP<82> et dans une méta-analyse d'études randomisées qui examinaient la valeur du traitement au tamoxifène chez les patientes atteintes d'un cancer du sein invasif<83>. En revanche, le nombre absolu des femmes à qui le traitement a permis d'éviter une réapparition du cancer dans le sein homolatéral était relativement modeste, s'établissant à 3 % après 5 ans<77>.

Le tamoxifène est relié à un risque, faible mais significatif, d'effets secondaires qui peuvent porter atteinte à la qualité de vie, comme les bouffées de chaleur, la sécheresse vaginale, des écoulements vaginaux et la dépression. En outre, le tamoxifène comporte un risque de complications qui peuvent mettre la vie des patientes en danger, y compris un risque excédentaire de 1 % de thrombose veineuse ou d'embolie pulmonaire et un risque excédentaire de moins de 1 % de carcinome de l'endomètre (voir [guide 12](#))<77,82,86>. Le risque de complications est plus élevé chez les femmes plus âgées et plus faible chez celles qui ont subi une hystérectomie.

À l'heure actuelle, il est impossible de se prononcer clairement en faveur de l'administration d'un traitement au tamoxifène chez l'ensemble ou même chez la plupart des patientes atteintes d'un CCIS unilatéral<87>. Il faut discuter des avantages et des risques possibles du tamoxifène dans le contexte du CCIS avec la patiente. Le tamoxifène pourrait constituer une modalité thérapeutique judicieuse pour une patiente déterminée à faire tout en son pouvoir pour éviter une récurrence du cancer du sein, mais qui refuse de subir une mastectomie, surtout si elle présente un risque élevé de cancer du sein contralatéral et un risque inférieur à la moyenne de complications reliées au tamoxifène.

- **Il importe d'offrir aux patientes de participer à des études cliniques, lorsque c'est possible.**

Les nombreuses zones grises ne peuvent être éliminées que par des études cliniques randomisées bien conçues. Les médecins qui traitent des patientes atteintes d'un

cancer du sein devraient par conséquent être au courant des études en cours et inviter leurs patientes à y participer.

---

## Références

1. Tavassoli F. *Pathology of the breast*. New York: Elsevier; 1992. p. 248-53.
2. Lagios MD. Ductal carcinoma in situ. Pathology and treatment. *Surg Clin North Am* 1990;70:853-71.
3. Sobin LH, Wittekind CH, editors. *TNM classification of malignant tumors*. 5th ed. Toronto: J. Wiley; 1997. p. 187-90.
4. Page DL, Jensen RA, Simpson JF. Premalignant and malignant diseases of the breast: the roles of the pathologist. *Mod Pathol* 1998;11:120-8.
5. Lagios MD, Westdahl PR, Margolin FR, Rose MR. Duct carcinoma in situ: relationship of extent of noninvasive disease to the frequency of occult invasion, multicentricity, lymph node metastases, and short-term treatment failures. *Cancer* 1982;50:1309-14.
6. Ernster VL, Barclay J. Increases in ductal carcinoma in situ (DCIS) of the breast in relation to mammography: a dilemma. *Natl Cancer Inst Monogr* 1997;22:151-6.
7. Winchester DJ, Menck HR, Winchester DP. National treatment trends for ductal carcinoma in situ of the breast. *Arch Surg* 1997;132:660-5.
8. Sackett DL. Rules of evidence and clinical recommendations on the use of antithrombotic agents. *Chest* 1989;95(Suppl):2S-4S.
9. Steering Committee on Clinical Practice Guidelines for the Care and Treatment of Breast Cancer. Clinical practice guidelines for the care and treatment of breast cancer. *CMAJ* 1998;158(3 Suppl):S1-83. Available: [www.cma.ca/cmaj/vol-158/issue-3/breastcpg](http://www.cma.ca/cmaj/vol-158/issue-3/breastcpg)
10. Holland R, Hendriks JH, Vebeek AL, Mravunac M, Schuurmans Stekhoven JH. Extent, distribution, and mammographic/histological correlations of breast carcinoma in situ. *Lancet* 1990;335:519-22.
11. Caines J, Cantin J, Hugi MR, Bowman DM, McGregor M. Clinical practice guidelines for the care and treatment of breast cancer: 2. Investigation of lesions detected by mammography. *CMAJ* 1998;158(3 Suppl):S9-S14. Available: [www.cma.ca/cmaj/vol-158/issue-3/breastcpg/0009.htm](http://www.cma.ca/cmaj/vol-158/issue-3/breastcpg/0009.htm)
12. Caines JS, Chantziantoniou K, Wright BA, Konok GP, Iles SE, Bodurtha A, et al. Nova Scotia Breast Screening Program experience: use of needle core biopsy in the diagnosis of screening-detected abnormalities. *Radiology* 1996;198:125-30.
13. Ikeda DM, Andersson I. Ductal carcinoma in situ: atypical mammographic appearances. *Radiology* 1989;172:661-6.
14. Kinkel K, Gilles R, Feger C, Guinebretiere JM, Tardivon AA, Masselot J, et al. Focal areas of increased opacity in ductal carcinoma in situ of the comedo type: mammographic-pathologic correlation. *Radiology* 1994;192:443-6.
15. Parker SH, Burbank F, Jackman RJ, Aucreman CJ, Cardenosa G, Cink MC, et al. Percutaneous large-core breast biopsy: a multi-institutional study. *Radiology* 1994;193:359-64.

16. Morrow M, Schnitt S, Harris JR. Ductal carcinoma in situ. In: Harris JR, Lippman M, Morrow M, Osborne CK, editors. *Diseases of the breast*. 2nd ed. Philadelphia: Lippincott Williams & Wilkins; 2000. p. 383-401.
17. Consensus conference on the classification of ductal carcinoma in situ. The Consensus Conference Committee. *Cancer* 1997;80:1798-802.
18. Wolf CJM, Pery NM, editors. *Macroscopic examination of biopsy and resection specimens. European guidelines for quality assurance in mammography screening*. European Commission; 1996.
19. Silverstein MJ, Waisman JR, Colburn WJ, Furmanski M, Lewinsky BS, Cohlan BF, et al. Intraductal breast carcinoma (DCIS) with and without microinvasion: Is there a difference in outcome? [abstract] *Proc Annu Meet Am Soc Clin Oncol* 1993;12:A24.
20. Frykberg E, Bland KI. Overview of the biology and management of ductal carcinoma in situ. *Cancer* 1994;74:350-62.
21. McCormick B, Rosen PP, Kinne D, Cox L, Yaholam J. Ductal carcinoma in situ of the breast: an analysis of local control after conservative surgery and radiotherapy. *Int J Radiat Oncol Biol Phys* 1991;21:289-92.
22. Silverstein MJ, Waisman JR, Gamagami P, Gierson ED, Colburn WJ, Rosser RJ, et al. Intraductal carcinoma of the breast (208 cases): clinical factors influencing treatment choice. *Cancer* 1990;66:102-8.
23. Cataliotti L, Distanto V, Ciatto S, Bianchi S, Pacini P, Simoncini R, et al. Intraductal breast cancer: review of 183 consecutive cases. *Eur J Cancer* 1992;28A:917-20.
24. Lilleng R, Hagmar B. The comedo subtype of intraductal carcinoma: cytologic characteristics. *Acta Cytol* 1992;36:345-52.
25. Malamud YR, Ducatman BS, Wang HH. Comparative features of comedo and non-comedo ductal carcinoma in situ of the breast on fine needle aspiration biopsy. *Diag Cytopathol* 1992;8:571-6.
26. Venegas R, Rutgers JL, Cameron BL, Vargas H, Butler JA. Fine needle aspiration cytology of breast ductal carcinoma in situ. *Acta Cytol* 1994;38:136-43.
27. Poller DN, Snead DR, Roberts EC, Galea M, Bell JA, Gilmour A, et al. Oestrogen receptor expression in ductal carcinoma in situ of the breast: relationship to flow cytometry analysis of DNA and expression of c-erb B2 oncoprotein. *Br J Cancer* 1993;68:156-61.
28. Silverstein MJ, Poller D, Waisman J, Colburn W, Barth A, Gierson E, et al. Prognostic classification of breast ductal carcinoma in situ. *Lancet* 1995;345:1154-7.
29. Bellamy CO, McDonald D, Salter DM, Chetty U, Anderson TJ. Noninvasive ductal carcinoma of the breast: the relevance of histologic categorization. *Hum Pathol* 1993;24:16-23.
30. Kuske RR, Bean JM, Garcia DM, Perez CA, Andriole D, Philpott G, et al. Breast conservation therapy for intraductal carcinoma of the breast. *Int J Radiat Oncol Biol Phys* 1993;26:391-6.
31. Lagios MD, Margolin FR, Westdahl PR, Rose MR. Mammographically detected ductal carcinoma in situ: frequency of local recurrence following tylectomy and prognostic effect of nuclear grade on local recurrence. *Cancer* 1989;63:618-24.
32. Schwartz GF, Patchefsky AS, Finklestein SD, Sohn SH, Prestipino A, Feig SA, et al. Nonpalpable in situ ductal carcinoma of the breast. Predictors of multicentricity and microinvasion and implications for treatment. *Arch Surg* 1989;124:29-32.

33. Solin LJ, Kurtz J, Fourquet A, Amalric R, Recht A, Barnstein BA, et al. Fifteen-year results of breast-conserving surgery and definitive breast irradiation for the treatment of ductal carcinoma in situ of the breast. *J Clin Oncol* 1996;14:754-63.
34. Hardman PDJ, Worth A, Lee U, Baird RM. The risk of occult invasive breast cancer after excisional biopsy showing in situ ductal carcinoma of comedo pattern. *Can J Surg* 1989;32:56-60.
35. Ringberg A, Palmer BV, Linell F, Rychterova V, Ljungberg O. Bilateral and multifocal breast carcinoma: a clinical and autopsy study with special emphasis on carcinoma in situ. *Eur J Surg Oncol* 1991;17:20-9.
36. Fisher ER, Costantino J, Fisher B, Palekar AS, Redmond C, Mamounas E. Pathologic findings from the National Surgical Adjuvant Breast Project (NSABP) protocol B-17. Intraductal carcinoma (ductal carcinoma in situ). The National Surgical Adjuvant Breast and Bowel Project Collaborating Investigators. *Cancer* 1995;75:1310-9.
37. Fisher B, Dignam J, Wolmark N, Mamounas E, Costantino J, Poller W, et al. Lumpectomy and radiation therapy for the treatment of intraductal breast cancer: findings from National Surgical Adjuvant Breast and Bowel Project B-17. *J Clin Oncol* 1998;16:441-52.
38. Solin LJ, Yeh IT, Kurtz J, Fourquet A, Recht A, Kuske R, et al. Ductal carcinoma in situ (intraductal carcinoma) of the breast treated with breast-conserving surgery and definitive irradiation: correlation of pathologic parameters with outcome of treatment. *Cancer* 1993;71:2532-42.
39. Zafrani B, Fourquet A, Vilcoq JR, Legal M, Calle R. Conservative management of intraductal breast carcinoma with tumorectomy and radiation therapy. *Cancer* 1986;57:1299-301.
40. Fisher B, Costantino J, Redmond C, Fisher E, Margolese R, Dimitrov N, et al. Lumpectomy compared with lumpectomy and radiation therapy for the treatment of intraductal breast cancer. *N Engl J Med* 1993;328:1581-6.
41. Schwartz GF, Finkel GC, Garcia JC, Pathefsky AS. Subclinical ductal carcinoma of the breast. Treatment by local excision and surveillance alone. *Cancer* 1992;70:2468-74.
42. Holland R, Peterse JL, Millis RR, Eusebi V, Faversly D, Van de Vijver MJ, et al. Ductal carcinoma in situ: a proposal for a new classification. *Semin Diagn Pathol* 1994;11:167-80.
43. Recht A, Rutgers EJ, Fentiman IS, Kurtz JM, Mansel RE, Sloane JP. The fourth EORTC DCIS Consensus meeting (Chateau Marquette, Heemskerk, The Netherlands, 23-24 January 1998) — conference report. *Eur J Cancer* 1998;34:1664-9.
44. Schnitt SJ, Harris JR, Smith BL. Developing a prognostic index for ductal carcinoma in situ of the breast. Are we there yet? *Cancer* 1996;77:2189-92.
45. Silverstein MJ, Lagios MD, Groshen S, Waisman JR, Lewinsky BS, Martino S, et al. The influence of margin width on local control of ductal carcinoma in situ of the breast. *N Engl J Med* 1999;340:1455-61.
46. Ellis IO, Pinder SE, Lee AH, Elston CW. A critical appraisal of existing classification systems of epithelial hyperplasia and in situ neoplasia of the breast

with proposals for future methods of categorization: Where are we going? *Sem Diagnostic Path* 1999;16:202-8.

47. Silverstein MJ, Lagios MD, Craig PH, Waisman JR, Lewinsky BS, Colburn WJ, et al. A prognostic index for ductal carcinoma of the breast in situ. *Cancer* 1996;77:2267-74.
48. Scott MA, Lagios MD, Axelsson K, Rogers LW, Anderson TJ, Page DL. Ductal carcinoma in situ of the breast: reproducibility of histological subtype analysis. *Hum Pathol* 1997;28:967-73.
49. Bijker N, Peterse JL, Duchateau L, Julien JP, Fentiman IS, Duval C, et al. Risk factors for recurrence and metastasis after breast-conserving therapy for ductal carcinoma-in-situ: analysis of European Organization for Research and Treatment of Cancer Trial 10853. *J Clin Oncol* 2001;19:2263-71.
50. Noguchi S, Aihara T, Koyama H, Motomura K, Inaji H, Imaoka S. Discrimination between multicentric and multifocal carcinomas of the breast through clonal analysis. *Cancer* 1994;74:872-7.
51. Silverstein MJ, Gierson ED, Colburn WJ, Cope LM, Furmanski M, Senofsky GM, et al. Can intraductal breast carcinoma be excised completely by local excision? *Cancer* 1994;73:2985-9.
52. De Mascarel I, Bonichon F, MacGrogan G, Tunon de Lara C, Avril A, Picot V, et al. Application of the Van Nuys prognostic index in a retrospective series of 367 ductal carcinomas in situ of the breast examined by serial macroscopic sectioning: practical considerations. *Breast Cancer Res Treat* 2000;61:151-9.
53. Bellamy COC, McDonald C, Salter DM, et al. Non-invasive ductal carcinoma of the breast: the relevance of histologic categorization. *Hum Pathol* 1993;24:16-23.
54. Noguchi S, Aihara T, Koyama H, Motomura K, Inaji H, Imaoka S. Discrimination between multicentric and multifocal carcinomas of the breast through clonal analysis. *Cancer* 1994;74:872-7.
55. Simpson T, Thirlby RC, Dail DH. Surgical treatment of ductal carcinoma in situ of the breast. 10- to 20-year follow up [review]. *Arch Surg* 1992;127:468-72.
56. Gump F. Multicentricity in early breast cancer. *Semin Surg Oncol* 1992;8:117-21.
57. Nielsen M, Jensen J, Andersen J. Precancerous and cancerous breast lesions during lifetime and at autopsy: a study of 83 women. *Cancer* 1984;54:612-5.
58. Harris JR, Recht A, Bornstein B, Schnitt S, Shulman L, Saderosky N. Ductal carcinoma in situ treated by excision plus radiotherapy: the influence of magnification views of mammography. Proceedings of the Breast Cancer Symposium, San Antonio, Tex., November 1994.
59. White J, Levine A, Gustafson G, Wimbish K, Ingold J, Pettinga J, et al. Outcome and prognostic factors for local recurrence in mammographically detected DCIS of the breast treated by surgery and radiation therapy. *Int J Radiat Oncol Biol Phys* 1995;31:791-7.
60. Ray GR, Adelson J, Hayhurst E, Marzoni A, Gregg D, Bronk M, et al. Ductal carcinoma in situ of the breast: results of treatment by conservative surgery and definitive irradiation. *Int J Radiat Oncol Biol Phys* 1994;28:105-11.
61. Silverstein MJ, Barth A, Poller DN, Gierson ED, Colburn WJ, Waisman JR, et al. Ten-year results comparing mastectomy to excision and radiation therapy for ductal carcinoma in situ of the breast. *Eur J Cancer* 1995;31A:1425-7.

62. Boyages J, Delaney G, Taylor R. Predictors of local recurrence after treatment of ductal carcinoma in situ: a meta-analysis. *Cancer* 1999;85:616-28.
63. Julien JP, Bijker N, Fentiman IS, Peterse JL, Delledonne V, Rouanet P, et al. Radiotherapy in breast-conserving treatment for ductal carcinoma in situ: first results of the EORTC randomised phase III trial 10853. EORTC Breast Cancer Cooperative Group and EORTC Radiotherapy Group. *Lancet* 2000;355:528-33.
64. Moore MM. Treatment of ductal carcinoma in situ of the breast. *Semin Surg Oncol* 1991;7:267-70.
65. Silverstein MJ, Waisman JR, Gierson ED, Colburn W, Gamagami P, Lewinsky BS. Radiation therapy for intraductal carcinoma: Is it an equal alternative? *Arch Surg* 1991;126:424-8.
66. DeHaes JC, van Oostrom MA, Welvaart K. The effect of radical conserving surgery on the quality of life of early breast cancer patients. *Eur J Surg Oncol* 1986;12:337-42.
67. Fallowfield LJ, Baum M, Maguire GP. Effects of breast conservation on psychological morbidity associated with diagnosis and treatment of early breast cancer. *BMJ* 1986;293:1331-4.
68. McArdle JM, Hughson AVM, McArdle CS. Reduced psychological morbidity after breast conservation. *Br J Surg* 1990;77:1221-3.
69. Steinberg MD, Juliano MA, Wise L. Psychological outcome of lumpectomy versus mastectomy in the treatment of breast cancer. *Am J Psychiatry* 1985;142:34-9.
70. Al-Ghazal SK, Fallowfield L, Blamey RW. Comparison of psychological aspects and patient satisfaction following breast conserving surgery, simple mastectomy and breast reconstruction. *Eur J Cancer* 2000;36:1938- 43.
71. Tate PS, McGee E, Hopkins S, Rogers E, Page G. Breast conservation versus mastectomy: patient preferences in a community practice in Kentucky. *J Surg Oncol* 1993;52:213-6.
72. Wobbes T, Tinnemans JG, van der Sluis RF. Residual tumour after biopsy for non-palpable ductal carcinoma in situ of the breast. *Br J Surg* 1989;76:185-6.
73. Gluck BS, Dershaw DD, Liberman L, Deutch BM. Microcalcifications on postoperative mammograms as an indicator of adequacy of tumor excision. *Radiology* 1993;188:469-72.
74. De Jong E, Peterse JL, van Dongen JA. Recurrence after breast ablation for ductal carcinoma in situ. *Eur J Surg Oncol* 1992;18:64-6.
75. Fisher DE, Schnitt SJ, Chistian R, Harris JR, Henderson IC. Chest wall recurrence of ductal carcinoma in situ of the breast after mastectomy. *Cancer* 1993;71:3025-8.
76. Montgomery RC, Fowble BL, Goldstein LJ, May DP, Hoffman JP, Sigurdson ER, et al. Local recurrence after mastectomy for ductal carcinoma in situ. *Breast J* 1998;4:430-6.
77. Fisher B, Dignam J, Wolmark N, Wickerham DL, Fisher ER, Mamounas E, et al. Tamoxifen in treatment of intraductal breast cancer: National Surgical Adjuvant Breast and Bowel Project B-24 randomised controlled trial. *Lancet* 1999;353:1993-2000.
78. Fisher ER, Dignam J, Tan-Chiu E, Costantino J, Fisher B, Paik S, et al. Pathologic findings from the National Surgical Adjuvant Breast Project (NSABP) eight-year update of Protocol B-17: intraductal carcinoma. *Cancer* 1999;86:429-38.

79. Fowble B, Yeh IT, Schultz DJ, Solin LJ, Rosato EF, Jardines L, et al. The role of mastectomy in patients with stage I-II breast cancer presenting with gross multifocal or multicentric disease or diffuse microcalcifications. *Int J Radiat Oncol Biol Phys* 1993;27:567-73.
80. Palmer BV, Mannur KR, Ross WB. Subcutaneous mastectomy with immediate reconstruction for early breast cancer. *Br J Surg* 1992;79:1309-11.
81. Price P, Sinnett HD, Gusterson B, Walsh G, A'Hern RP, McKinna JA. Duct carcinoma in situ: predictors of local recurrence and progression in patients treated by surgery alone. *Br J Cancer* 1990;61:869-72.
82. Fisher B, Costantino JP, Wickerham DL, Redmond CK, Kavanah M, Cronin WM, et al. Tamoxifen for prevention of breast cancer: report of the National Surgical Adjuvant Breast and Bowel Project P-1 Study. *J Natl Cancer Inst* 1998;90:1371-88.
83. Tamoxifen for early breast cancer: an overview of the randomised trials. Early Breast Cancer Trialists' Collaborative Group. *Lancet* 1998;351:1451-67.
84. Silverstein MJ, Gierson ED, Colburn WJ, Rosser RJ, Waisman JR, Gamagami P. Axillary lymphadenectomy for intraductal carcinoma of the breast. *Surg Gynecol Obstet* 1991;172:211-4.
85. Olivotto I, Jackson J, Mates D, Andersen S, Davidson W, Bryce C, et al. Prediction of axillary lymph node involvement of women with invasive breast carcinoma. *Cancer* 1998;83:948-55.
86. Fisher B, Dignam J, Bryant J, DeCillis A, Wickerham DL, Wolmark N, et al. Five versus more than five years of tamoxifen therapy for breast cancer patients with negative lymph nodes and estrogen receptor-positive tumor. *J Natl Cancer Inst* 1996;88:1529-42.
87. Schwartz GF, Solin LJ, Olivotto IA, Ernster VL, Pressman PI. Consensus conference on the treatment of in situ ductal carcinoma of the breast, April 22-25, 1999. *Cancer* 2000;88:946-54.
